# Supplementary material for: Trophic states regulate assembly processes and network structures of small chromophytic phytoplankton communities in subtropical coastal ecosystem
Source: Research Square preprint supplement (doi:10.21203/rs.3.rs-55561/v3), 2020-10-29
Supplement: Supplementary file 1 [file d6ee2a231236d865e2576056.docx]

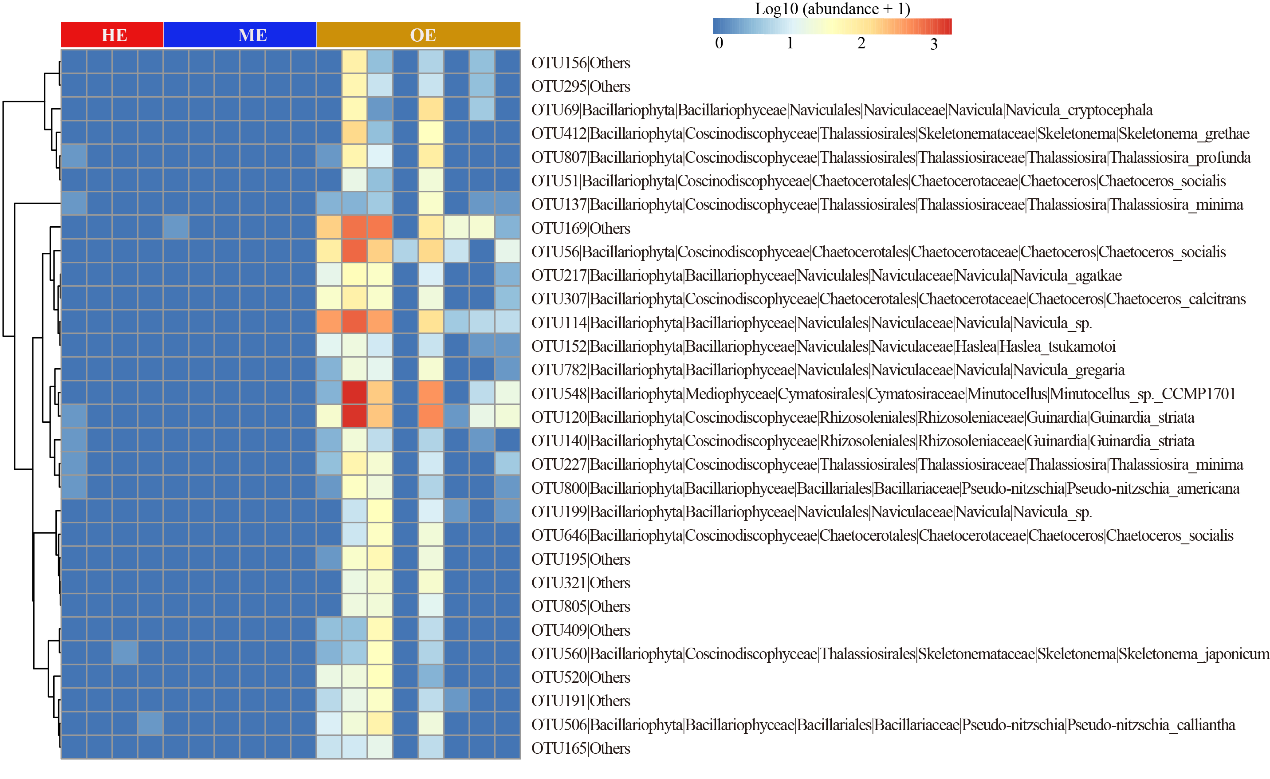


**Figure S1.** Heatmap of the distribution of the thirty keystone species in the SCP co-occurrence network.


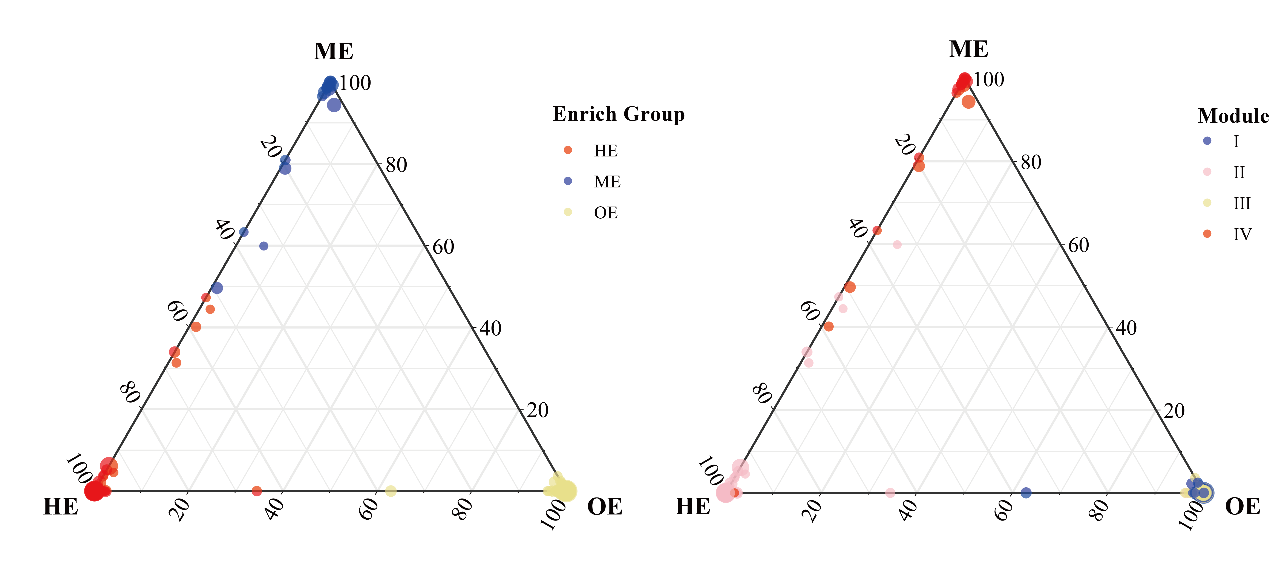


**Figure S2.** Ternary plots showing relative abundance of ASVs from modules I-VI corresponding to three eutrophication groups (HE, ME, and OE). Each dot represents one individual ASV, whose abundance was averaged over all samples in different groups.
